# Supplementary material for: Solid-Phase Partitioning and Leaching Behavior of Pb and Zn from Playground Soils in Kabwe, Zambia
Source: MDPI journal article supplement (doi:10.3390/toxics9100248), 2021-10-04
Supplement: s1 [file s1]

# Supplementary Materials: Solid-phase partitioning and leaching behavior of Pb and Zn from playground soils in Kabwe, Zambia.

Walubita Mufalo, Pawit Tangviroon, Toshifumi Igarashi, Mayumi Ito, Tsutomu Sato, Meki Chirwa, Imasiku Nyambe, Hokuto Nakata, Shouta Nakayama and Mayumi Ishizuka

## Summary

This supplement is divided into 4 sections, including 7 tables and 3 figures. It provides additional data on the following: (1) soil classification, X-ray powder diffraction (XRD), and Pearson correlation matrix for the soil samples (2) Degree of contamination (3) Solid-phase partitioning, labile mobile fraction % and water-soluble relations with the exchangeable phase, labile phase, and total contents of Pb and Zn in the SPs (4) PHREEQC analysis and batch leaching results

### 1. Soil classification, X-ray powder diffraction (XRD), and Pearson correlation matrix for the soil samples

**Table S1.** A brief description of the type of soil samples collected: Particle size distribution into clay, silt, and sand according to the United States Department of Agriculture for the size groups of mineral particles (USDA, 1987) [1].

| Sample | Location                              | Type of Soil | Clay %<br>( $< 2 \mu\text{m}$ ) | Silt %<br>( $2\text{--}50 \mu\text{m}$ ) | Sand %<br>( $> 50 \mu\text{m}$ ) |
|--------|---------------------------------------|--------------|---------------------------------|------------------------------------------|----------------------------------|
| S1     | Community ground in Kasanda           | Sandy loam   | 2.51                            | 47.9                                     | 49.6                             |
| S2     | Makululu primary school               | Loam         | 8                               | 47.8                                     | 44.2                             |
| S3     | Malumbo community ground              | Silt loam    | 1.38                            | 51.2                                     | 47.5                             |
| S4     | Makululu day secondary                | Silt loam    | 0.86                            | 53.4                                     | 45.7                             |
| S5     | Makululu day secondary garden         | Sandy loam   | 0.42                            | 37.2                                     | 62.3                             |
| S6     | David Ramushu secondary school        | Sandy loam   | 0                               | 39.0                                     | 61.0                             |
| S7     | David Ramushu secondary school garden | Sandy loam   | 0                               | 43.8                                     | 56.2                             |
| S8     | Kebar Christian academy               | Silt loam    | 0.04                            | 55.9                                     | 44.1                             |

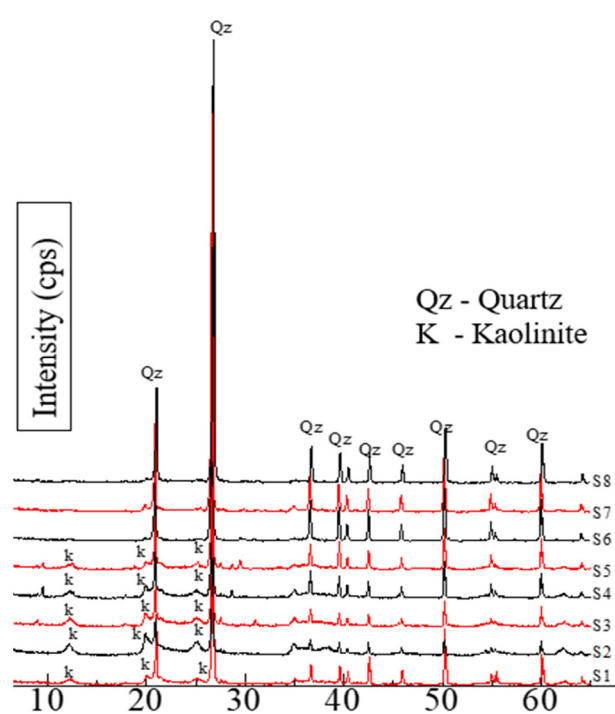

Figure S1. XRD patterns showing the major minerals found in the SPs.

Table S2. Pearson correlation matrix for chemical composition for the SPs. Marked correlation is significant at  $p < 0.05$ .

|                                         | SiO <sub>2</sub><br>(wt%) | TiO <sub>2</sub><br>(wt%) | Al <sub>2</sub> O <sub>3</sub><br>(wt%) | Fe <sub>2</sub> O <sub>3</sub><br>(wt%) | MnO<br>(wt%) | MgO<br>(wt%) | CaO<br>(wt%) | K <sub>2</sub> O<br>(wt%) | P <sub>2</sub> O <sub>5</sub><br>(wt%) | S<br>(wt%) | TOC<br>(wt%) | Pb<br>(mg/kg) | Zn<br>(mg/kg) |
|-----------------------------------------|---------------------------|---------------------------|-----------------------------------------|-----------------------------------------|--------------|--------------|--------------|---------------------------|----------------------------------------|------------|--------------|---------------|---------------|
| SiO <sub>2</sub><br>(wt%)               | 1.0                       |                           |                                         |                                         |              |              |              |                           |                                        |            |              |               |               |
| TiO <sub>2</sub><br>(wt%)               | -0.2                      | 1.0                       |                                         |                                         |              |              |              |                           |                                        |            |              |               |               |
| Al <sub>2</sub> O <sub>3</sub><br>(wt%) | -0.8                      | 0.6                       | 1.0                                     |                                         |              |              |              |                           |                                        |            |              |               |               |
| Fe <sub>2</sub> O <sub>3</sub><br>(wt%) | -0.5                      | -0.5                      | 0.2                                     | 1.0                                     |              |              |              |                           |                                        |            |              |               |               |
| MnO<br>(wt%)                            | -0.6                      | -0.4                      | 0.2                                     | 0.5                                     | 1.0          |              |              |                           |                                        |            |              |               |               |
| MgO<br>(wt%)                            | -0.4                      | 0.5                       | 0.6                                     | 0.3                                     | -0.3         | 1.0          |              |                           |                                        |            |              |               |               |
| CaO<br>(wt%)                            | 0.0                       | -0.4                      | -0.5                                    | 0.3                                     | 0.0          | -0.1         | 1.0          |                           |                                        |            |              |               |               |
| K <sub>2</sub> O<br>(wt%)               | 0.2                       | 0.2                       | 0.2                                     | 0.0                                     | -0.2         | 0.0          | -0.4         | 1.0                       |                                        |            |              |               |               |
| P <sub>2</sub> O <sub>5</sub><br>(wt%)  | 0.3                       | -0.2                      | -0.2                                    | -0.4                                    | 0.3          | -0.8         | -0.4         | 0.4                       | 1.0                                    |            |              |               |               |
| S (wt%)                                 | 0.7                       | -0.3                      | -0.6                                    | -0.7                                    | -0.1         | -0.6         | -0.1         | -0.3                      | 0.5                                    | 1.0        |              |               |               |
| TOC<br>(wt%)                            | 0.5                       | -0.3                      | -0.3                                    | -0.5                                    | 0.0          | -0.7         | -0.3         | -0.1                      | 0.7                                    | <b>0.8</b> | 1.0          |               |               |
| Pb<br>(mg/kg)                           | 0.2                       | -0.4                      | -0.2                                    | -0.4                                    | 0.5          | -0.8         | -0.4         | -0.1                      | 0.9                                    | <b>0.7</b> | <b>0.8</b>   | 1.0           |               |
| Zn<br>(mg/kg)                           | 0.0                       | 0.0                       | 0.0                                     | -0.5                                    | 0.4          | -0.7         | -0.4         | 0.0                       | 0.8                                    | <b>0.4</b> | <b>0.6</b>   | <b>0.8</b>    | 1             |

## 2. Degree of Contamination

**Table S3.** Pollution indices with the total average value across the SPs.

| Playgrounds | Enrichment factor<br>(EF) |      | Geo-accumulation<br>Index ( $I_{geo}$ ) |     |
|-------------|---------------------------|------|-----------------------------------------|-----|
|             | Pb                        | Zn   | Pb                                      | Zn  |
| S1          | 141.4                     | 23.4 | 6.9                                     | 6.4 |
| S2          | 25.4                      | 9.9  | 5.3                                     | 6.1 |
| S3          | 53.2                      | 7.8  | 5.3                                     | 4.6 |
| S4          | 7.5                       | 2.1  | 3.3                                     | 3.6 |
| S5          | 23.2                      | 3.1  | 4.6                                     | 3.7 |
| S6          | 32.1                      | 10.7 | 5.0                                     | 5.5 |
| S7          | 50.3                      | 11.1 | 6.0                                     | 5.9 |
| S8          | 124.9                     | 17.3 | 6.9                                     | 6.1 |
| Average     | 57.3                      | 10.7 | 5.4                                     | 5.3 |

## 3. Solid-phase partitioning, labile mobile fraction% and water-soluble relations with the exchangeable phase, labile phases, and total content of Pb and Zn in the SPs

**Table S4.** Solid-phase partitioning of Pb: mean content for each phase (mg/kg), standard deviation (SD), and percentage (%) partitioning for each phase in the SPs.

| Pb              | Phase 1 |      |      | Phase 2 |      |      | Phase 3 |      |      | Phase 4 |      |      | Phase 5 |      |      |
|-----------------|---------|------|------|---------|------|------|---------|------|------|---------|------|------|---------|------|------|
|                 | Mean    | SD   | %    |
| SPs ( $n = 3$ ) |         |      |      |         |      |      |         |      |      |         |      |      |         |      |      |
| S1              | 578.2   | 59.1 | 20.7 | 599     | 84.6 | 21.4 | 622     | 60.8 | 22.3 | 767     | 81.2 | 27.5 | 229     | 27.6 | 8.2  |
| S2              | 67.7    | 9.7  | 10.4 | 124     | 37.5 | 19.5 | 125     | 17.4 | 20.0 | 207     | 11.2 | 33.4 | 104     | 15.2 | 16.6 |
| S3              | 45.5    | 5.7  | 5.2  | 341     | 78.3 | 38.4 | 295     | 35.5 | 33.6 | 140     | 2.6  | 16.1 | 59      | 3.8  | 6.8  |
| S4              | 1.3     | 0.2  | 0.6  | 36      | 7.3  | 17.4 | 79      | 3.7  | 38.7 | 53      | 2.1  | 26.0 | 35      | 10.4 | 17.2 |
| S5              | 1.2     | 0.1  | 0.4  | 101     | 18.2 | 31.9 | 135     | 10.8 | 43.0 | 59      | 0.2  | 18.8 | 19      | 2.2  | 6.0  |
| S6              | 2.0     | 0.1  | 0.3  | 155     | 41.7 | 22.6 | 205     | 18.5 | 30.2 | 185     | 3.5  | 27.2 | 134     | 4.9  | 19.8 |
| S7              | 22.9    | 4.4  | 1.6  | 533     | 84.2 | 35.8 | 412     | 38.3 | 29.5 | 370     | 54.3 | 26.4 | 93      | 0.5  | 6.7  |
| S8              | 170.6   | 15.4 | 9.4  | 763     | 76.1 | 41.8 | 435     | 30.8 | 23.9 | 388     | 53.2 | 21.2 | 70      | 7.7  | 3.8  |

**Table S5.** Solid-phase partitioning of Zn: mean content for each phase (mg/kg), standard deviation (SD), and percentage (%) partitioning for each phase in the SPs.

| Zn              | Phase1 |      |      | Phase 2 |      |      | Phase3 |      |      | Phase4 |      |      | Phase 5 |      |      |
|-----------------|--------|------|------|---------|------|------|--------|------|------|--------|------|------|---------|------|------|
|                 | Mean   | SD   | %    | Mean    | SD   | %    | Mean   | SD   | %    | Mean   | SD   | %    | Mean    | SD   | %    |
| SPs ( $n = 3$ ) |        |      |      |         |      |      |        |      |      |        |      |      |         |      |      |
| S1              | 362    | 55.1 | 22.5 | 198     | 15.1 | 13.0 | 383    | 6.1  | 23.8 | 194    | 19.0 | 12.0 | 460     | 8.4  | 28.6 |
| S2              | 54     | 9.9  | 6.6  | 81      | 45.5 | 12.8 | 110    | 17.0 | 13.3 | 137    | 13.3 | 16.6 | 415     | 23.9 | 50.7 |
| S3              | 45     | 7.5  | 8.1  | 98      | 14.9 | 19.1 | 176    | 34.5 | 31.5 | 88     | 9.3  | 15.8 | 141     | 22.8 | 25.6 |
| S4              | 2      | 0.3  | 1.0  | 24      | 0.4  | 13.4 | 55     | 7.6  | 29.9 | 31     | 17.0 | 16.9 | 72      | 16.8 | 38.8 |
| S5              | 2      | 0.8  | 0.7  | 37      | 1.9  | 15.1 | 57     | 5.1  | 25.4 | 25     | 19.9 | 9.8  | 118     | 27.9 | 49.0 |
| S6              | 5      | 0.9  | 0.4  | 175     | 35.8 | 14.4 | 387    | 37.7 | 28.6 | 307    | 56.0 | 22.6 | 460     | 39.0 | 34.0 |
| S7              | 47     | 9.6  | 4.1  | 293     | 62.3 | 28.6 | 517    | 71.9 | 45.1 | 138    | 43.9 | 11.9 | 117     | 14.7 | 10.4 |
| S8              | 173    | 29.9 | 17.7 | 322     | 13.5 | 32.6 | 301    | 56.5 | 30.7 | 87     | 26.3 | 8.9  | 95      | 3.4  | 9.9  |

**Table S6.** Labile % (phase 1; exchangeable + phase 2; carbonates + phase 3; Fe/Mn oxides) for the SPs.

| SPs | S1 | S2 | S3 | S4 | S5 | S6 | S7 | S8 |
|-----|----|----|----|----|----|----|----|----|
| Pb  | 64 | 50 | 77 | 57 | 75 | 53 | 67 | 75 |
| Zn  | 59 | 33 | 59 | 44 | 41 | 43 | 78 | 81 |

(a)

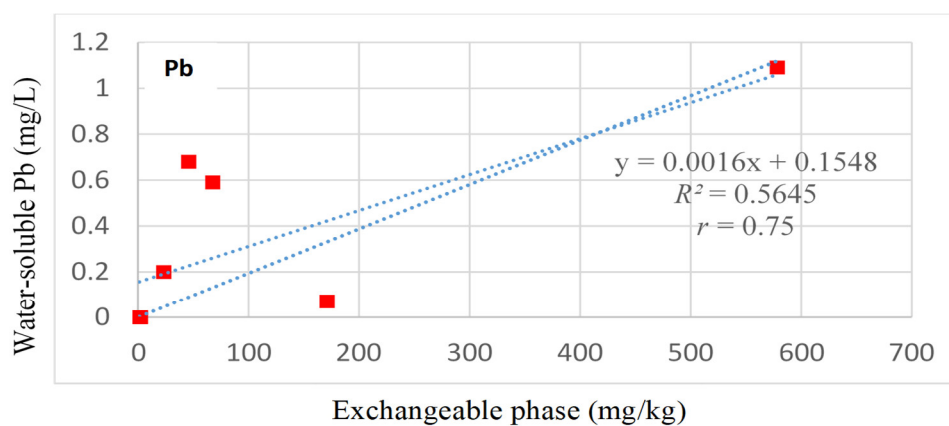

(b)

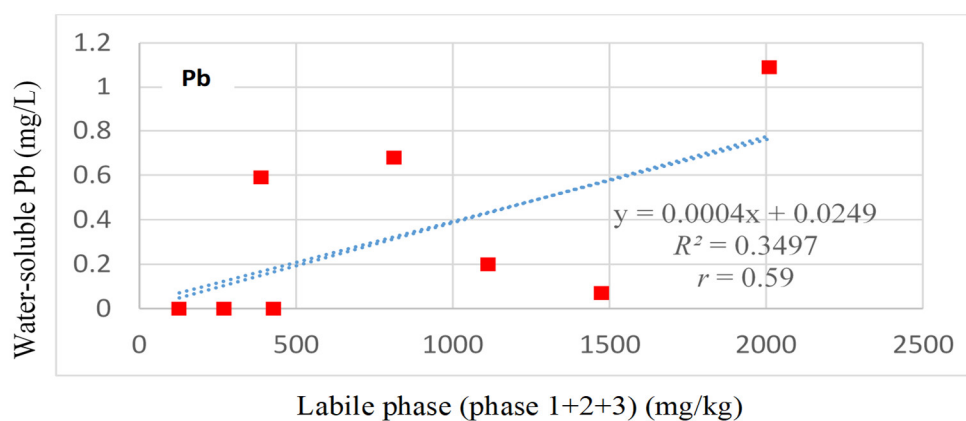

(c)

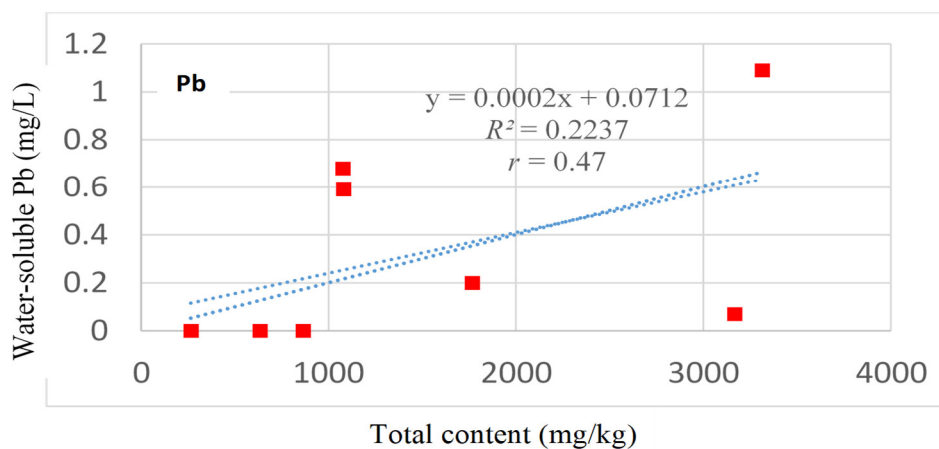**Figure S2.** Relationship between water-soluble Pb with (a) exchangeable phase (b) labile phase 1+2+3 and (c) total content.

(a)

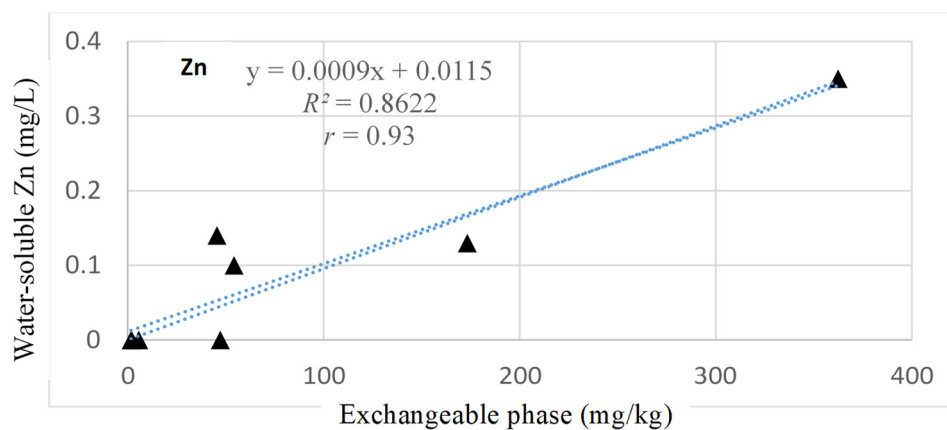

(b)

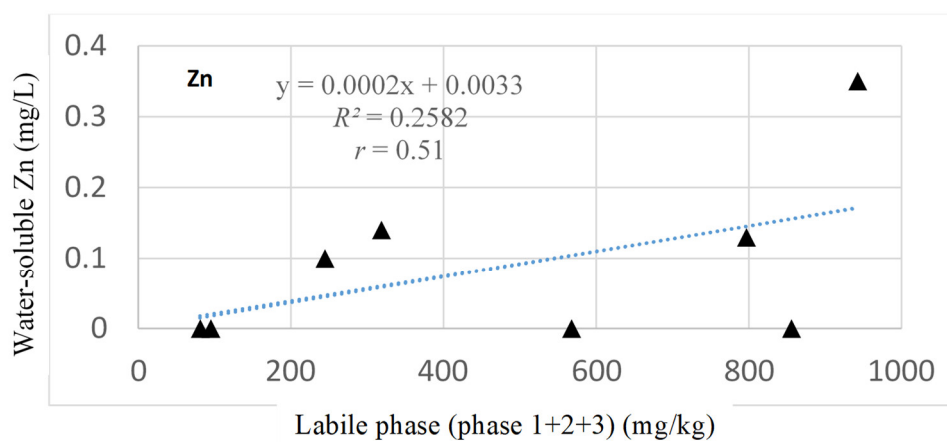

(c)

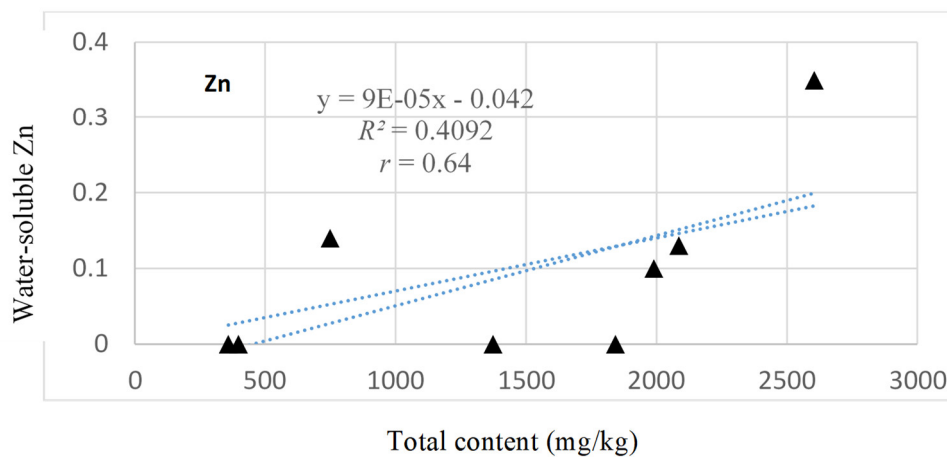

**Figure S3.** Relationship between water-soluble Zn with (a) exchangeable phase (b) labile phase 1+2+3 and (c) total content.

#### 4. PHREEQC analysis and batch leaching results

**Table S7.** Saturation indices (*SI*) of selected mineral phases controlling the release and retention of Pb and Zn in the selected SPs.

|     | CaSO <sub>4</sub> ·2H <sub>2</sub> O | PbSO <sub>4</sub> | FeOOH        | Al(OH) <sub>3</sub> | Fe(OH) <sub>3</sub> |
|-----|--------------------------------------|-------------------|--------------|---------------------|---------------------|
| SPs | Gypsum                               | Anglesite         | Ferrihydride | Gibbsite            | Goethite            |
| S1  | -2.93                                | -1.43             | 4.05         | 4.76                | 6.77                |
| S2  | -3.45                                | -2.33             | 4.58         | 4.39                | 7.3                 |
| S3  | -3.15                                | -2.19             | 5.22         | 4.05                | 7.94                |
| S7  | -2.51                                | -2.41             | 5.07         | 3.61                | 7.79                |
| S8  | -1.55                                | -2.03             | 1.85         | 3.1                 | 4.61                |

SI > 0: Saturated, SI < 0: Unsaturated.

**Table S8.** Leachate characteristics of the SPs, including other dissolved minerals.

| Sample | T(°C) | ORP<br>(mV) | EC<br>(mS/cm) | Eh<br>(mV) | Alkalinity<br>(meq/L) | Al<br>(mg/L) | Ca<br>(mg/L) | K<br>(mg/l) | SO <sub>4</sub> <sup>2-</sup><br>(mg/L) | Mg<br>(mg/L) | Fe<br>(mg/L) | Si<br>(mg/L) |
|--------|-------|-------------|---------------|------------|-----------------------|--------------|--------------|-------------|-----------------------------------------|--------------|--------------|--------------|
| S1     | 22.8  | 214±30      | 0.13±0.08     | 455        | 0.07                  | 34.6±5.2     | 9.6±0.62     | 11.3±1.2    | 19±1.8                                  | 3.6±0.7      | 16.4±7       | 63.8±0.6     |
| S2     | 22.9  | 177±38      | 0.06±0.01     | 418        | 0.16                  | 32.3±5.5     | 10.4±1.33    | 5.8±0.7     | 5.1±0.7                                 | 6.1±1.8      | 9.46±4       | 66.9±0.5     |
| S3     | 22.9  | 158±57      | 0.08±0.05     | 399        | 0.27                  | 33.8±5.6     | 13.3±0.4     | 12.2±1.8    | 8±0.9                                   | 1.9±0.6      | 18.8±10      | 62±3.2       |
| S4     | 22.9  | 199±27      | 0.04±0.01     | 440        | 0.02                  | 1.3±1.5      | 2.8±0.21     | 3.2±0.9     | 5.4±0.3                                 | 0.7±0.3      | ND           | 1.6±0.4      |
| S5     | 22.9  | 142±23      | 0.19±0.02     | 383        | 0.56                  | 6.0±5.9      | 35.4±0.5     | 5.9±0.6     | 13±1                                    | 2.1±0.6      | ND           | 4.1±0.3      |
| S6     | 22.2  | 152±23      | 0.25±0.03     | 393        | 0.32                  | ND           | 37.0±0.1     | 5.7±1.4     | 20±0.9                                  | 5.4±0.1      | ND           | 1.3±0.2      |
| S7     | 22.8  | 161±32      | 0.23±0.01     | 402        | 0.29                  | 19.4±2.4     | 22.8±0.59    | 14.8±0.6    | 23±0.3                                  | 7.3±1.4      | 9.6±3        | 29.1±0.5     |
| S8     | 23    | 193±18      | 0.57±0.05     | 434        | 0.22                  | 1.7±3        | 46.8±1.3     | 17.7±1.8    | 166±3.5                                 | 29.1±3.4     | ND           | 3.5±0.2      |

\*ND = Not detected.

#### References

1. USDA, 1987. <https://www.wcc.nrcs.usda.gov/ftpref/wntsc/H&H/training/soilsother/soil-USDA-textural-class.pdf>
